# Supplementary material for: Towards a new multiscale air quality transport model using the fully unstructured anisotropic adaptive mesh technology of Fluidity (version 4.1.9)
Source: Copernicus journal article supplement (doi:10.5194/gmd-8-3421-2015), 2015-10-28
Supplement: Supplementary file [file gmd-8-3421-2015-supplement-title-page.pdf › gmd-8-3421-2015-supplement-title-page.pdf]

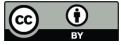

## *Supplement of*

# **Towards a new multiscale air quality transport model using the fully unstructured anisotropic adaptive mesh technology of Fluidity (version 4.1.9)**

**J. Zheng et al.**

*Correspondence to:* F. Fang (f.fang@imperial.ac.uk)

- gmd-8-3421-2015-supplement-title-page.pdf
- case1
  - CV\_Adapt
    - \* 100
    - \* 200
    - \* 400
    - \* 50
    - \* 800
  - CV\_Fix
    - \* 100
    - \* 200
    - \* 400
    - \* 50
  - DG\_Adapt
    - \* 100
    - \* 200
    - \* 400
    - \* 50
    - \* 800
  - DG\_Fix
    - \* 100
    - \* 200
    - \* 400
    - \* 50
  - Makefile
- case2

- CV\_Adapt
    - \* 100
    - \* 200
    - \* 400
    - \* 50
    - \* 800
  - CV\_Fix
    - \* 100
    - \* 200
    - \* 400
    - \* 50
  - DG\_Adapt
    - \* 100
    - \* 200
    - \* 400
    - \* 50
    - \* 800
  - DG\_Fix
    - \* 100
    - \* 200
    - \* 400
    - \* 50
  - Makefile
- case3
    - CV\_Adapt
      - \* 12800
    - DG\_Adapt
      - \* 12800
    - Makefile

The copyright of individual parts of the supplement might differ from the CC-BY 3.0 licence.
